# Supplementary material for: Topical Administration of Crisaborole in Mild to Moderate Atopic Dermatitis: A Systematic Review and Meta‐Analysis
Source: Hindawi journal article supplement (doi:10.1155/2023/1869934), 2023-01-01
Supplement: f1 [file 1869934.f1.docx]

**Supporting Information**

**eTable 1.** Search Strategy

**eFig 1.** Risk of bias of the included studies

**eFig 2.** Funnel plot of the studies included in the pooled analysis of AEs

**eFig 3.** Change from baseline in POEM

**eFig 4.** Proportion of patients achieving EASI 75

**eFig 5.** Change from baseline in DFI

**eFig 6.** Incidence of AEs

**eFig 7.** Incidence of SAEs

**eFig 8.** Incidence of AE-related withdrawal

**eTable 1. Search Strategy**

| **EMBASE** (May 3, 2022) | #1 | 'atopic dermatitis'/exp OR 'atopic dermatitis' OR (atopic AND ('dermatitis'/exp OR dermatitis)) | 59806 |
| --- | --- | --- | --- |
| #2 | 'atopic eczema'/exp OR 'atopic eczema' OR (atopic AND ('eczema'/exp OR eczema)) | 55146 |
| #3 | #1 OR #2 | 60345 |
| #4 | 'crisaborole'/exp OR crisaborole | 490 |
| #5 | 'eucrisa'/exp OR eucrisa | 455 |
| #6 | 'an2728'/exp OR an2728 | 485 |
| #7 | 'an 2728'/exp OR 'an 2728' | 452 |
| #8 | #4 OR #5 OR #6 OR #7 | 527 |
| #9 | #3 AND #8 | 417 |
|  | | | |
| **MEDLINE** <1946 to May 3, 2022> | #1 | atopic dermatitis.mp. or exp Dermatitis, Atopic/ | 31532 |
| #2 | dermatitis, atopic.mp. | 23020 |
| #3 | atopic eczema.mp. | 2998 |
| #4 | #1 or #2 or #3 | 32463 |
| #5 | crisaborole.mp. | 167 |
| #6 | eucrisa.mp. | 13 |
| #7 | an2728.mp. | 9 |
| #8 | an 2728.mp. | 4 |
| #9 | #5 or #6 or #7 or #8 | 169 |
| #10 | #4 and #9 | 142 |
|  | | | |
| **CENTRAL** (May 3, 2022) | #1 | MeSH descriptor: [Dermatitis, Atopic] explode all trees | 1998 |
| #2 | MeSH descriptor: [Eczema] explode all trees | 1185 |
| #3 | (atopic):ti,ab,kw AND (dermatitis or eczema):ti,ab,kw | 5480 |
| #4 | (dermatitis, atopic):ti,ab,kw | 5200 |
| #5 | (eczema, atopic):ti,ab,kw | 2400 |
| #6 | #1 OR #2 OR #3 OR #4 OR #5 | 5880 |
| #7 | (crisaborole):ti,ab,kw | 83 |
| #8 | (Eucrisa):ti,ab,kw | 5 |
| #9 | (an2728):ti,ab,kw | 20 |
| #10 | (an 2728):ti,ab,kw | 192 |
| #11 | #7 OR #8 OR #9 OR #10 | 296 |
| #12 | #6 AND #11 | 91 |

**eFig 1. Risk of bias of the included studies**

**eFig 2. Funnel plot of the studies included in the pooled analysis of AEs**

**eFig 3. Change from baseline in POEM**

**eFig 4. Proportion of patients achieving EASI 75**

**eFig 5. Change from baseline in DFI**

**eFig 6. Incidence of AEs**

**eFig 7. Incidence of SAEs**

**eFig 8. Incidence of AE-related withdrawal**
